# Supplementary material for: Cobalt Iron Oxide (CoFe2O4) Nanoparticles Induced Toxicity in Rabbits
Source: MDPI journal article supplement (doi:10.3390/vetsci10080514), 2023-08-09
Supplement: s1 [file s1]

**Table 1.** Comparison of hematological profile of normal and cobalt iron oxide (CoFe<sub>2</sub>O<sub>4</sub>) nanoparticles (CIONPs) treated rabbits.

| Parameters/Day                                      | Groups/Treatments |            | P-Values |
|-----------------------------------------------------|-------------------|------------|----------|
|                                                     | A                 | B          |          |
| Red Blood Cells (10 <sup>6</sup> /mm <sup>3</sup> ) |                   |            |          |
| 5                                                   | 5.51±0.21         | 4.95±0.25  | 0.11     |
| 10                                                  | 5.39±0.19         | 3.33±0.12  | 0.01     |
| White Blood Cells                                   |                   |            |          |
| 5                                                   | 13.35±0.41        | 14.2±0.15  | 0.12     |
| 10                                                  | 13.21±0.21        | 17.93±0.19 | 0.01     |
| Hemoglobin (gm/dl)                                  |                   |            |          |
| 5                                                   | 13.5±0.16         | 12.6±0.31  | 0.13     |
| 10                                                  | 13.05±0.23        | 9.05±0.2   | 0.02     |
| Hematocrit (%)                                      |                   |            |          |
| 5                                                   | 37.6±1.23         | 36.3±1.32  | 0.10     |
| 10                                                  | 35.9±1.11         | 26.23±2.11 | 0.01     |
| Neutrophils (%)                                     |                   |            |          |
| 5                                                   | 22.7±1.53         | 31.15±1.75 | 0.01     |
| 10                                                  | 23.3±1.13         | 33.91±2.31 | 0.01     |
| Lymphocytes (%)                                     |                   |            |          |
| 5                                                   | 24.7±1.2          | 23.29±0.29 | 0.15     |
| 10                                                  | 23.3±1.1          | 15.4±0.19  | 0.01     |
| Monocytes (%)                                       |                   |            |          |
| 5                                                   | 5.83±0.43         | 5.11±0.12  | 0.10     |
| 10                                                  | 6.41±0.51         | 4.13±0.17  | 0.01     |

Results are expressed as Mean ± S.D the values in each row are significantly different in treated rabbits as compared to untreated rabbits; (n=16; 8 each in control/untreated group A and treated group B).

**Table 2.** Comparison of serum biochemistry profile of normal and cobalt iron oxide (CoFe<sub>2</sub>O<sub>4</sub>) nanoparticles (CIONPs) treated rabbits.

| Parameters/Day                 | Groups/Treatments* |            | P-Values |
|--------------------------------|--------------------|------------|----------|
|                                | A                  | B          |          |
| Alanine Aminotransferase (U/L) |                    |            |          |
| 5                              | 79.4±1.31          | 89.5±3.31  | 0.04     |
| 10                             | 81.6±1.21          | 95.9±2.21  | 0.01     |
| Alkaline Phosphatase (U/L)     |                    |            |          |
| 5                              | 54.43±3.33         | 56.23±0.3  | 0.15     |
| 10                             | 55.61±0.23         | 66.11±0.2  | 0.01     |
| Albumin (mg/dL)                |                    |            |          |
| 5                              | 3.69±0.16          | 3.62±0.13  | 0.10     |
| 10                             | 3.79±0.14          | 2.65±0.11  | 0.01     |
| Total protein (mg/dL)          |                    |            |          |
| 5                              | 6.55±0.21          | 6.15±0.31  | 0.10     |
| 10                             | 6.65±0.11          | 4.05±0.10  | 0.01     |
| Urea (mg/dL)                   |                    |            |          |
| 5                              | 41.8±2.3           | 45.9±1.3   | 0.14     |
| 10                             | 42.9±2.1           | 49±1.11    | 0.01     |
| Creatinine (mg/dL)             |                    |            |          |
| 5                              | 1.33±0.14          | 1.46±0.15  | 0.11     |
| 10                             | 1.35±0.11          | 2.19±0.17  | 0.01     |
| Cholesterol (mg/dL)            |                    |            |          |
| 5                              | 78.1±3.41          | 80.5±2.4   | 0.13     |
| 10                             | 79.6±4.33          | 93.5±2.3   | 0.01     |
| Triglycerides (mg/dL)          |                    |            |          |
| 5                              | 96.8±2.3           | 98.9±1.22  | 0.11     |
| 10                             | 98.7±2.2           | 117.9±1.27 | 0.01     |
| Glucose (mg/dL)                |                    |            |          |
| 5                              | 60.5±2.2           | 62.1±1.13  | 0.12     |
| 10                             | 61.4±2.3           | 78.9±2.3   | 0.01     |

\*Results are expressed as Mean ± S.D the values in each row are significantly different in treated rabbits as compared to untreated rabbits; (*n* = 16; 8 each in control/untreated group A and treated group B).

**Table 3.** Antioxidant enzymes and oxidative stress biomarkers of normal and cobalt iron oxide (CoFe<sub>2</sub>O<sub>4</sub>) nanoparticles (CIONPs) treated rabbits.

| Parameters/Day                       | Groups/Treatments* |            | P-Values |
|--------------------------------------|--------------------|------------|----------|
|                                      | A                  | B          |          |
| Superoxide dismutase (U/mg)          |                    |            |          |
| 5                                    | 28.15±1.99         | 26.24±1.78 | 0.15     |
| 10                                   | 29.55±3.1          | 19.11±1.4  | 0.01     |
| Peroxidase (U/mg)                    |                    |            |          |
| 5                                    | 2.83±0.17          | 2.71±0.13  | 0.14     |
| 10                                   | 2.78±0.21          | 1.81±0.19  | 0.01     |
| Reduced glutathione(U/mg)            |                    |            |          |
| 5                                    | 28.9±1.56          | 27.3±1.07  | 0.10     |
| 10                                   | 30.3±1.25          | 22.6±1.03  | 0.01     |
| Catalase (U/mg)                      |                    |            |          |
| 5                                    | 23.5±3.1           | 22.6±1.03  | 0.01     |
| 10                                   | 24.1±1.09          | 14.7±2.1   | 0.001    |
| Malondialdehyde concentration (U/mg) |                    |            |          |
| 5                                    | 25.2±1.6           | 28.1±1.2   | 0.12     |
| 10                                   | 26.4±1.01          | 33.3±1.77  | 0.01     |

\*Results are expressed as Mean ± S.D the values in each row are significantly different in treated rabbits as compared to untreated rabbits; (*n* = 16; 8 each in control/untreated group A and treated group B).
